# Supplementary material
Source: PubMed Central journal article supplement (PMC2691715)
Supplement: NIHMS116735-supplement-Supplement.pdf [file NIHMS116735-supplement-Supplement.pdf]

## SUPPLEMENTARY INFORMATION

Figure S1

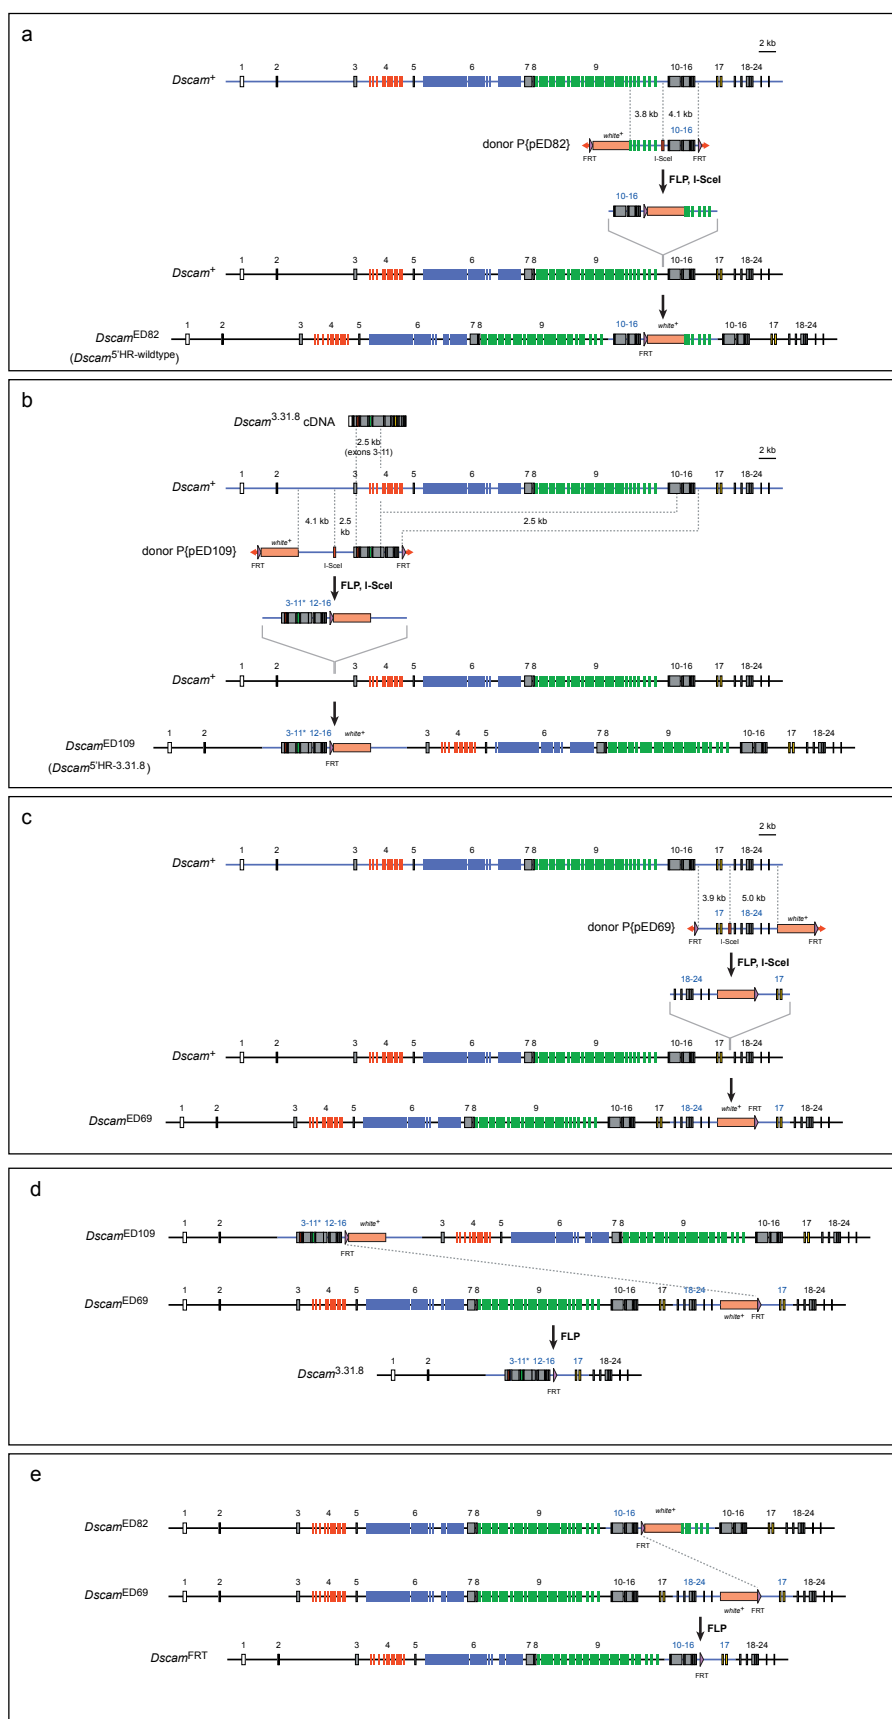

**Figure S1: Generation of *Dscam* single ectodomain alleles.** Outline of the strategy used to isolate *Dscam*<sup>single</sup> and *Dscam*<sup>FRT</sup> alleles. Intermediate alleles consisting of a tandem duplication with intervening *white*<sup>+</sup> marker and FRT site (**a-c**) were recombined by FLP recombinase to generate the final alleles, selected by loss of the *white*<sup>+</sup> marker (**d, e**). P-element based donor elements were constructed as shown in (**a-c**), and cloning PCR fragments obtained from the corresponding genomic or cDNA regions are indicated by the blue line and blue

exon numbers. The donor P{pED109} was prepared from a *Dscam*<sup>3.31.8</sup> cDNA, as illustrated. Similarly, P{pED113} and P{pED114} donors were prepared from *Dscam*<sup>10.27.25</sup> and *Dscam*<sup>6.5.9</sup>, respectively. Asterisk in (**b**) indicates exons 3–11 derived from the cDNA. FRT, I-SceI, and P-element ends (red arrows) are not drawn to scale. The precise regions of the targeted alleles that derive from the donor element are not known. *Dscam*<sup>5HR</sup> alleles used for intragenic MARCM (Fig. 4a) are depicted in (**a**) and (**b**).
